# Supplementary material
Source: Elsevier journal article supplement (https://www.sciencedirect.com/science/article/pii/S0025775321004267)
Supplement: mmc1 [file S0025775321004267:mmc1.doc]

**Table 1S. Analysis of the mutational profile of patients with Ph-MPNs.**

| **Type of mutation** | **No mutation** | **Mutation** | **Not performed** |
| --- | --- | --- | --- |
| **JAK2, n (%)** | **13 (22.8)** | **44 (77.2)** | **0 (0.0)** |
| **CALR, n (%)** | **4 (7.3)** | **7 (12.7)** | **44 (80.0)** |
| **MPL, n (%)** | **1 (1.7)** | **3 (5.3)** | **53 (93.0)** |

Ph-MPNs**:** Philadelphia negative myeloprofiferative neoplasm.
